# Supplementary material for: The Impact of Shift Length on Burnout, Job Dissatisfaction, and Intention to Leave Among Hospital Nurses in the West Bank: A Cross-Sectional Study
Source: Research Square preprint supplement (doi:10.21203/rs.3.rs-7447301/v1), 2025-09-10
Supplement: Supplementary file 1 [file 41ac46946f629e3e300b33df.docx]

**Study Questionnaire:** The Impact of Shift Length on Burnout, Job Dissatisfaction, and Intention to Leave Among Hospital Nurses in the West Bank: A Cross-Sectional Study

**Instructions**

Dear Participant,

Thank you for agreeing to take part in this research study. This questionnaire is designed to understand your work experiences and well-being. Your participation is voluntary, and all your responses will be kept strictly confidential and used for academic research purposes only.

Please read each question carefully and select the answer that best reflects your situation and feelings. There are no right or wrong answers.

**Section 1: Sociodemographic and Professional Characteristics**

Please provide the following information by ticking (✓) the appropriate box or writing your answer.

**1. Age:**

- Under 25 years
- 25–34 years
- 35–44 years
- 45–54 years
- 55 years and above

**2. Gender:**

- Male
- Female

**3. Place of Residence:**

- City
- Village
- Refugee Camp

**4. Years of Experience as a Registered Nurse:**

- Less than 1 year
- 1–5 years
- 6–10 years
- 11–15 years
- More than 15 years

**5. Hospital of Employment:**

- Al-Watani Hospital
- Rafidia Hospital
- Tubas Hospital
- Palestinian Medical Complex
- Other (please specify): _________________________

**6. Department/Unit:**

- Internal Medicine
- Intensive Care Unit (ICU)
- Emergency Department
- Surgery
- Pediatrics
- Neonatal
- Operating Room
- Other (please specify): _________________________

**7. What is your average monthly income (in Israeli Shekels - ILS)?**

- 1,500–2,500 ILS
- 2,500–3,500 ILS
- 3,500–4,500 ILS
- Above 4,500 ILS

**Section 2: Shift Nature and Length Assessment**

**8. What is your usual shift duration?**

- 8 hours
- 12 hours
- 16 hours

**9. What is your usual shift type?**

- Day shift
- Night shift
- Rotating shift (alternating between day and night)

**10. On average, how many hours do you work per week?** ________ hours

**Section 3: Job Satisfaction Scale (JSS-NU)**

**Instructions:** The following statements are about your job. Please indicate how much you agree or disagree with each statement.

**Scale:**
1 = Disagree Very Much | 2 = Disagree | 3 = Disagree Slightly | 4 = Neutral | 5 = Agree Slightly | 6 = Agree | 7 = Agree Very Much

| **No.** | **Item** | **1 2 3 4 5 6 7** |
| --- | --- | --- |
| **JS1.** | I find my nursing work personally rewarding. |  |
| **JS2.** | I feel respected and valued by my colleagues. |  |
| **JS3.** | My working environment is positive and supportive. |  |
| **JS4.** | I am content with the professional growth opportunities available to me here. |  |
| **JS5.** | Overall, I am satisfied with my current job as a nurse. |  |

***Scoring:*** *Sum of all items. Higher scores indicate greater job satisfaction.*

**Section 4: Nursing Burnout Scale (NBS)**

**Instructions:** Please read each statement carefully and decide how often you feel this way about your job. Circle the number that indicates the frequency.

**Scale:**
0 = Never | 1 = A few times a year or less | 2 = Once a month or less | 3 = A few times a month | 4 = Once a week | 5 = A few times a week | 6 = Every day

**A. Emotional Exhaustion (EE) – 9 items**

| **No.** | **Item** | **0 1 2 3 4 5 6** |
| --- | --- | --- |
| **EE1.** | I feel completely drained of energy at the end of my shift. |  |
| **EE2.** | The emotional demands of my job are more than I can handle. |  |
| **EE3.** | I feel overwhelmed by my workload. |  |
| **EE4.** | I dread going to work. |  |
| **EE5.** | I feel too tired to enjoy my time off. |  |
| **EE6.** | I feel like I am running on empty. |  |
| **EE7.** | My job leaves me feeling physically and mentally exhausted. |  |
| **EE8.** | I feel I have nothing more to give at work. |  |
| **EE9.** | The stress from work makes it hard to relax. |  |

**B. Depersonalization (DP) – 5 items**

| **No.** | **Item** | **0 1 2 3 4 5 6** |
| --- | --- | --- |
| **DP1.** | I have become less sympathetic toward patients since I started this job. |  |
| **DP2.** | I sometimes feel indifferent to my patients' problems. |  |
| **DP3.** | I find myself just going through the motions without real engagement. |  |
| **DP4.** | I feel detached from the people I care for. |  |
| **DP5.** | I have become more cynical about my work. |  |

**C. Personal Efficacy (PE) – 8 items**

| **No.** | **Item** | **0 1 2 3 4 5 6** |
| --- | --- | --- |
| **PE1.** | I feel I make a positive difference in my patients' lives. (R) |  |
| **PE2.** | I can effectively solve problems that arise in my work. (R) |  |
| **PE3.** | I handle emotional situations with patients calmly and effectively. (R) |  |
| **PE4.** | I feel confident in my ability to provide high-quality care. (R) |  |
| **PE5.** | I am able to create a good rapport with my patients. (R) |  |
| **PE6.** | I feel capable and skilled in my nursing role. (R) |  |
| **PE7.** | I find meaning and purpose in my work. (R) |  |
| **PE8.** | I feel I contribute positively to my team. (R) |  |

**(R) = Reverse-scored item.** *For scoring, responses to these items must be reversed (e.g., 0→6, 1→5, 2→4, 3→3, 4→2, 5→1, 6→0). A high score on the PE subscale indicates high efficacy.*

**Section 5: Intention to Leave Scale (ITL-N)**

**Instructions:** Please indicate how much you agree or disagree with the following statements about your current job.

**Scale:**
1 = Strongly Disagree | 2 = Disagree | 3 = Slightly Disagree | 4 = Neutral | 5 = Slightly Agree | 6 = Agree | 7 = Strongly Agree

| **No.** | **Item** | **1 2 3 4 5 6 7** |
| --- | --- | --- |
| **ITL1.** | I am planning to look for a new job outside of this hospital. |  |
| **ITL2.** | I often fantasize about leaving this job. |  |
| **ITL3.** | It is likely that I will actively seek a different job in the next year. |  |
| **ITL4.** | I feel that my future lies in a workplace other than this one. |  |

***Scoring:*** *Sum of all items. Higher scores indicate a stronger intention to leave.*

**Thank you for your valuable time and contribution to this study.**
